Megan McDonald *et al.*

**Distribution and inheritance of a gene cluster encoding a sulfated tyrosine peptide in *Xanthomonas* spp.**

Running title: *raxX-raxSTAB* gene cluster in *Xanthomonas* spp.

**Megan McDonald,<sup>\*,1</sup> Benjamin Schwessinger,<sup>\*,1,2</sup>**

**Valley Stewart,<sup>†,3</sup> and Pamela C. Ronald<sup>†,2,4</sup>**

\* These authors contributed equally to this work

The authors declare no conflict of interest. Supported by grants from NIH and NSF.

<sup>1</sup> Research School of Biology, Australian National University, Canberra

<sup>2</sup> Department of Plant Pathology and the Genome Center, University of California, Davis

<sup>3</sup> Department of Microbiology & Molecular Genetics, University of California, Davis

<sup>4</sup> Joint Bioenergy Institute, Emeryville, California

<sup>†</sup> corresponding authors:

Valley Stewart

Dpt. Microbiology & Molecular Genetics

University of California, Davis

One Shields Avenue

Davis CA 95616-8665 USA

Email: [vjstewart@ucdavis.edu](mailto:vjstewart@ucdavis.edu)

Office: (530) 754-7994

Fax: (530) 754-8973

Pamela C. Ronald

Department of Plant Pathology

University of California, Davis

One Shields Avenue

Davis CA 95616-8665 USA

Email: [pcronald@ucdavis.edu](mailto:pcronald@ucdavis.edu)

Office: (530) 752-1654

Fax: (530) 752-5674

Megan McDonald *et al.*

## ABSTRACT

1 Tyrosine sulfation is a post-translational modification that influences interaction  
2 specificity between certain receptors and their protein ligands in diverse biological  
3 processes. For example, rice XA21 receptor-mediated recognition of the sulfated  
4 bacterial protein RaxX activates an immune response and triggers resistance to the  
5 phytopathogen *Xanthomonas oryzae* pv. *oryzae* (*Xoo*). A five kb *raxX-raxSTAB* gene  
6 cluster of *Xoo* encodes RaxX, the RaxST tyrosylprotein sulfotransferase and the RaxA  
7 and RaxB components of a predicted proteolytic maturation and ATP-dependent  
8 peptide secretion complex. The complete *raxX-raxSTAB* gene cluster was found only in  
9 *Xanthomonas* species, and its distribution is consistent with multiple gain and loss  
10 events during *Xanthomonas* speciation. Homologs of the *raxST* gene are present in  
11 genome sequences of diverse bacterial species. Together, these results establish a  
12 foundation for investigating biological roles for tyrosine sulfation in bacteria.

ABSTRACT = 132 words (maximum 200)

Megan McDonald *et al.*

## INTRODUCTION

13 Host receptors activate innate immunity pathways upon pathogen recognition (Ronald  
14 and Beutler 2010). The gene encoding the rice XA21 receptor kinase (Song *et al.*,  
15 1995) confers broad spectrum resistance against the gamma-proteobacterium  
16 *Xanthomonas oryzae* pv. *oryzae* (*Xoo*) (Wang *et al.*, 1996). This well-studied XA21-*Xoo*  
17 model provides a basis from which to understand molecular and evolutionary  
18 mechanisms of host-microbe interactions.

19 Several *Xoo* *rax* genes are required for activation of XA21-mediated immunity (Fig. 1a).  
20 The *raxX-raxSTAB* gene cluster encodes the 60-residue RaxX predicted precursor  
21 protein that undergoes sulfation by the RaxST tyrosylprotein sulfotransferase at residue  
22 Tyr-41 (Pruitt *et al.*, 2015). We hypothesize that the RaxABC proteolytic maturation and  
23 ATP-dependent peptide secretion complex (da Silva *et al.*, 2004) further processes the  
24 sulfated RaxX precursor by removing its double-glycine leader peptide prior to secretion  
25 (Holland *et al.*, 2016). Located outside the *raxX-raxSTAB* gene cluster, the *raxC* gene,  
26 an ortholog of the *tolC* gene, encodes the predicted outer membrane channel for this  
27 complex (da Silva *et al.*, 2004). Finally, the *raxPQ* genes encode enzymes to assimilate  
28 sulfate into 3'-phosphoadenosine 5'-phosphosulfate (Shen *et al.*, 2002), the sulfodonor  
29 for the RaxST tyrosylprotein sulfotransferase (Han *et al.*, 2012).

30 Tyrosylprotein sulfotransferase is confined to the Golgi complex in both plants and  
31 animals (Moore 2009). Thus, this post-translational modification is targeted to a subset  
32 of cell surface and secreted proteins that influence a variety of eukaryotic physiological  
33 processes (Matsubayashi 2014; Stone *et al.*, 2009). For example, tyrosine sulfation of  
34 the chemokine receptors CCR5 and CXCR4 is necessary for high-affinity binding not  
35 only to chemokines, but also to the HIV-1 surface glycoprotein (Farzan *et al.*, 1999;

Megan McDonald *et al.*

36 Kleist *et al.*, 2016). In plants, sulfated tyrosine peptides influence xylem development,  
37 root growth, and/or plant immune signaling (Matsubayashi 2014; Zhou *et al.*, 2017).

38 RaxST sulfation of RaxX residue Tyr-41 is the only example of tyrosine sulfation  
39 reported in bacteria (da Silva *et al.*, 2004; Pruitt *et al.*, 2015). Strikingly, RaxX residues  
40 40-52 share sequence similarity with mature active plant peptide containing sulfated  
41 tyrosine (PSY) hormones (Amano *et al.*, 2007; Pruitt *et al.*, 2015; Pruitt *et al.*, 2017).  
42 Indeed, RaxX, like PSY1, can enhance root growth in diverse plant species (Pruitt *et al.*,  
43 2017). Moreover, RaxX also contributes to *Xoo* virulence in the absence of the XA21  
44 immune receptor (Pruitt *et al.*, 2017). This apparent hormone mimicry by RaxX  
45 therefore may serve broad functions in *Xoo* pathogenesis. To further elucidate the  
46 biological role of bacterial tyrosine sulfation, we sought to identify the species  
47 distribution and possible origin of genes in the *raxX-raxSTAB* gene cluster.

48 Here we show that the *raxX-raxSTAB* gene cluster is confined to a subset of  
49 *Xanthomonas* species. In all cases examined, the *raxX-raxSTAB* gene cluster lies  
50 between two core (housekeeping) genes, *gcvP* encoding a subunit of glycine  
51 dehydrogenase, and a gene encoding a major facilitator subfamily transporter ("*mfsX*").  
52 Examination of nucleotide sequence conservation across the *raxX-raxSTAB* gene  
53 cluster, and at its boundaries with the *gcvP* and "*mfsX*" genes, suggests that the *raxX-*  
54 *raxSTAB* gene cluster was acquired through lateral transfer by *X. translucens*, a  
55 pathogen of diverse cereal species (Langlois *et al.*, 2017), and separately by *X.*  
56 *maliensis*, associated with but nonpathogenic for rice (Triplett *et al.*, 2015). Finally,  
57 genes homologous to *raxST* are present in bacterial genomes from a wide range of  
58 species, raising the possibility that RaxST-catalyzed tyrosine sulfation may occur in  
59 other genomic and biological contexts in addition to RaxX.

Megan McDonald *et al.*

## RESULTS

### **The *raxX-raxSTAB* gene cluster is present in a subset of *Xanthomonas* spp.**

60 We searched databases at the National Center for Biotechnology Information to identify  
61 bacterial genomes with the *raxX-raxSTAB* gene cluster. We found the *raxX-raxSTAB*  
62 gene cluster exclusively in *Xanthomonas* spp., and ultimately detected it in more than  
63 200 unique genome sequences among 413 accessed through the RefSeq database  
64 (O'Leary *et al.*, 2016).

65 *Xanthomonas* taxonomy has undergone substantial changes over the years (Vauterin *et*  
66 *al.*, 2000; Young 2008); see (Midha and Patil 2014) for a representative example). At  
67 one point, many strains were denoted as pathovars of either *X. campestris* or *X.*  
68 *axonopodis*, but today over 20 species are distinguished, many with multiple pathovars  
69 (Rademaker *et al.*, 2005; Vauterin *et al.*, 1995). Because many of the genome  
70 sequences we examined are from closely-related strains, in some cases associated  
71 with different species designations, we constructed a phylogenetic tree in order to  
72 organize these sequences by relatedness (**Fig. S1**).

73 The phylogenetic relationships among *Xanthomonas* spp. was assessed using the  
74 entire genome assembly with Andi v0.10 (Haubold *et al.*, 2015; Klotzl and Haubold  
75 2016). We compared our topology with several other *Xanthomonas* phylogenetic trees  
76 published previously (Ferreira-Tonin *et al.*, 2012; Gardiner *et al.*, 2014; Hauben *et al.*,  
77 1997; Midha and Patil 2014; Parkinson *et al.*, 2007; Parkinson *et al.*, 2009; Rademaker  
78 *et al.*, 2005; Triplett *et al.*, 2015; Young *et al.*, 2008). Most share broad similarity with  
79 each other and with the whole-genome tree presented here in defining relationships

Megan McDonald *et al.*

80 between well-sampled species. To facilitate discussion, we represent our phylogenetic  
81 tree as a cladogram (**Fig. 2**).

82 We detected the *raxX-raxSTAB* gene cluster in six lineages that consistently are  
83 identified as being distinct from one another (Rademaker *et al.*, 2005; Vauterin *et al.*,  
84 1995) (**Fig. 2**). One lineage includes the two *X. oryzae* pathovars, *oryzae* and *oryzicola*,  
85 pathogenic on rice (Niño-Liu *et al.*, 2006). A second lineage includes *X. vasicola*,  
86 strains of which are pathogenic on sugarcane, sorghum or maize, together with strains  
87 denoted as *X. campestris* pv. *musacearum*, pathogenic on banana (Aritua *et al.*, 2008).  
88 The third lineage includes *X. euvesicatoria* and *X. perforans*, pathogenic on pepper and  
89 tomato (Potnis *et al.*, 2015), together with strains denoted as *X. alfalfa* subsp.  
90 *citrumelonis* (pathogenic on citrus) and *X. dieffenbachiae* (anthuriums) (Rademaker  
91 group 9.2; (Barak *et al.*, 2016; Rademaker *et al.*, 2005). The fourth lineage includes  
92 strains denoted as *X. axonopodis* pathovars *manihotis* (pathogenic on cassava) and  
93 *phaseoli* (bean) (Rademaker group 9.4; (Mhedbi-Hajri *et al.*, 2013; Rademaker *et al.*,  
94 2005).

95 The fifth lineage includes *X. translucens*, different strains of which are pathogenic on  
96 one or more cereal crops such as wheat and barley, and/or non-cereal forage and  
97 turfgrass species (Langlois *et al.*, 2017). *X. translucens* is within the distinct cluster of  
98 "early-branching" species whose divergence from the remainder apparently occurred  
99 relatively early during *Xanthomonas* speciation (Parkinson *et al.*, 2007). The sixth  
100 lineage comprises *X. maliensis*, associated with but nonpathogenic on rice (Triplett *et*  
101 *al.*, 2011); phylogenetic analyses place this species between the "early-branching"  
102 species and the remainder (Triplett *et al.*, 2015).

Megan McDonald *et al.*

103 Notably, the *raxX-raxSTAB* gene cluster is absent from the *X. citri* pathovar group,  
104 pathogenic on a range of dicots including citrus. This group, which includes certain  
105 strains denoted as *X. axonopodis* or *X. campestris* (Bansal *et al.*, 2017), clusters  
106 phylogenetically among the *X. oryzae*, *X. euvesicatoria* and *X. axonopodis* pv.  
107 *manihotis* groups (Midha and Patil 2014; Rademaker *et al.*, 2005; Vauterin *et al.*, 1995)  
108 (Fig. 2).

109 Together, these observations suggest that the *raxX-raxSTAB* gene cluster experienced  
110 multiple gains and/or losses during *Xanthomonas* speciation.

### **Sequence conservation of the *raxX-raxSTAB* gene cluster suggests lateral transfer between *Xanthomonas* spp.**

111 From the initial analysis described above, we selected 15 species, representing the  
112 phylogenetic range of *Xanthomonas*, for more detailed analyses of *rax* gene cluster  
113 composition, organization, and inheritance (Fig. 2; Table 1). The corresponding  
114 genome sequences are accompanied by published descriptions (Table 1). The close  
115 relative *Stenotrophomonas maltophilia*, which does not contain the *raxX-raxSTAB* gene  
116 cluster, serves as a reference (Moore *et al.*, 1997).

117 Both the organization and size of the *raxX-raxSTAB* gene cluster are conserved across  
118 all six lineages in which it resides. To address hypotheses for patterns of *raxX*-  
119 *raxSTAB* gene cluster inheritance, we compared individual phylogenetic trees for each  
120 of the four *rax* genes to the overall *Xanthomonas* phylogenetic tree (Fig. 3) (Kuo and  
121 Ochman 2009). For all four genes, sequences in *X. translucens*, in the early-branching  
122 group, cluster separately from sequences in the other lineages. This finding is  
123 congruent with the hypothesis, that *X. translucens* acquired the *raxX-raxSTAB* gene

Megan McDonald *et al.*

124 cluster relatively early during *Xanthomonas* speciation. For *X. maliensis*, the *raxX*-  
125 *raxSTAB* genes assort among those from *X. euvesicatoria* and the *X. axonopodis*  
126 pathovars *manihotis* and *phaseoli* (Fig. 3), even though the *X. maliensis* genome  
127 sequence itself is more distantly related (Fig. 2). This finding suggests that *X. maliensis*  
128 acquired the *raxX-raxSTAB* gene cluster relatively late during *Xanthomonas* speciation.

129 The *raxX-raxSTAB* gene cluster lies between two core (housekeeping) genes (Fig. 1a).  
130 One, *gcvP*, encodes the pyridoxal-phosphate subunit of glycine dehydrogenase. An  
131 approximately 170 nt riboswitch (*gcvR* in Fig. 1a) controls GcvP protein synthesis in  
132 response to glycine (Mandal *et al.*, 2004). The other, "*mfsX*", encodes a major  
133 facilitator subfamily (MFS) transporter related to Bcr and CflA efflux proteins (da Silva *et al.*  
134 *al.*, 2004). Here, "*mfsX*" is only a provisional designation absent functional  
135 characterization.

136 We further examined phylogenetic relationships by comparing nucleotide sequence  
137 identity across the *gcvP*, *raxX*, *raxST*, *raxA*, *raxB* and "*mfsX*" coding regions, each from  
138 the initiation through termination codon (Table 2). For comparison, values are  
139 presented also for genome-wide average nucleotide intity (gANI) as well as the  
140 alignment fraction (AF), which estimates the fraction of orthologous genes (Varghese *et al.*  
141 *al.*, 2015). For context, a widely-used criterion assigns 95% average nucleotide intity  
142 (ANI) as the cut-off point for species delineation (Goris *et al.*, 2007). Sequence from *X.*  
143 *euvesicatoria* is the reference.

144 The *raxST*, *raxA* and *raxB* coding sequences from *X. axonopodis* pv. *manihotis* and *X.*  
145 *maliensis* display the highest identity to those from *X. euvesicatoria*, at least 95% in  
146 each case. Sequences from *Xoo* and *X. vasicola* (also known as *X. campestris* pv.  
147 *malvacearum*) are about 90% identical, and those from *X. translucens* roughly 75%



Megan McDonald *et al.*

148 identical (**Table 2**). The *raxX* coding sequences are more divergent, with identity to the  
149 *X. euvesicatoria* sequence ranging from almost 90% for *X. maliensis* and *Xoo* to only  
150 63% for *X. translucens* (**Table 2**).

### **Boundaries flanking the *raxX-raxSTAB* gene cluster and adjacent genes suggest lateral transfer through general recombination**

151 Comparison of the *gcvP* - [*raxX-raxSTAB*] - "*mfsX*" region from all 16 reference species  
152 reveals sharp boundaries flanking the position of the *raxX-raxSTAB* gene cluster. On  
153 the left flank, substantial nucleotide identity spans the *gcvP* gene, the *gcvR* riboswitch,  
154 and a presumptive promoter -10 element (Mitchell *et al.*, 2003) (**Fig. 1b**). On the right  
155 flank, identity begins shortly after the "*mfsX*" initiation codon. Accordingly, upstream  
156 signals for "*mfsX*" gene transcription (Mitchell *et al.*, 2003) and translation (Ma *et al.*,  
157 2002) are conserved within, but not between, *raxX-raxSTAB*-positive and -negative  
158 sequences (**Fig. 1b**).

159 Between these boundaries in *raxX-raxSTAB* gene cluster-negative species, the  
160 compact ( $\leq 200$  nt) *gcvP*-"*mfsX*" intergenic sequence is modestly conserved in most  
161 genomes (about 60-80% overall identity) (**Fig. 1b**). Much of this identity comes from the  
162 "*mfsX*" potential transcription and translation initiation sequences described above. The  
163 overall intergenic sequence is less conserved in the early-branching species (*X.*  
164 *albilineans*, *X. hyacinthi* and *X. sacchari*), displaying about 50-65% overall identity.

165 In *raxX-raxSTAB* gene cluster-positive genomes, sequence flanking these boundaries  
166 appears unrelated to the *gcvP*-"*mfsX*" intergenic sequence from *raxX-raxSTAB* gene  
167 cluster-negative genomes (**Fig. 1b**). Rather, it is well-conserved even in the early-

Megan McDonald *et al.*

168 branching species, *X. translucens*. These results suggest that anomalous *raxX*-  
169 *raxSTAB* gene cluster phylogenetic distribution results from lateral gene transfer.

170 Sequences of the adjacent *gcvP* gene display length polymorphisms (Fig. 4) that do not  
171 align with overall *Xanthomonas* species relationships (Fig. 2). Polymorphisms of this  
172 type are unusual, and indicate recombination (Nelson *et al.*, 1997). Their occurrence in  
173 a gene adjacent to the *raxX-raxSTAB* gene cluster independently supports the model,  
174 that this genomic region evolves through lateral gene transfer.

### ***raxST* homologs are present in genomes of diverse bacterial species**

175 As we searched genome sequences available through GenBank for evidence of the  
176 *raxX-raxSTAB* gene cluster outside of *Xanthomonas* spp., we identified sequences  
177 encoding proteins with about 40% identity to, and approximately the same length as, the  
178 *Xoo* RaxST protein. Sequence identity is high in residues that form the binding pocket  
179 for the cofactor, 3'-phosphoadenosine 5'-phosphosulfate (da Silva *et al.*, 2004; Kakuta  
180 *et al.*, 1998), consistent with assignment of these encoded proteins as  
181 sulfotransferases. It is not known if these genes encoding tyrosylprotein  
182 sulfotransferases, as there are no defined sequence features that distinguish such  
183 enzymes from other sulfotransferases that have non-protein substrates (Dong *et al.*,  
184 2012; Teramoto *et al.*, 2013).

185 These *raxST* homologs are in a range of bacterial phyla including Proteobacteria and  
186 Cyanobacteria (Fig. 5). Nevertheless, for most species represented by multiple  
187 genome sequences, the *raxST* homolog was detected in a minority of individuals, so it  
188 is not part of the core genome in these strains. Moreover, relationships between  
189 species in a *raxST* gene phylogenetic tree bear no resemblance to those in the overall

Megan McDonald *et al.*

190 tree of bacterial species. For example, in the *raxST* gene tree, sequences from  
191 Cyanobacteria are flanked on both sides by sequences from Proteobacteria (**Fig. 5**).  
192 Together, these findings provide evidence for lateral transfer of *raxST* homologs  
193 transfer (Kuo and Ochman 2009).

Megan McDonald *et al.*

## DISCUSSION

194 We hypothesize that the *raxX-raxSTAB* gene cluster originated in an ancestor to the  
195 lineage containing *X. oryzae*, *X. euvesicatoria*, and related species, with further gains or  
196 loss through lateral transfer as described below (**Fig. 2**). Analysis suggests that  
197 relatively few events were necessary to form the *raxX-raxSTAB* gene cluster. The  
198 *raxAB* genes are homologous to those encoding proteolytic maturation and ATP-  
199 dependent peptide secretion complexes (da Silva *et al.*, 2004; Lin *et al.*, 2015), related  
200 to type 1 secretion systems but specialized for secreting small peptides such as  
201 bacteriocins and peptide pheromones (Holland *et al.*, 2016). Frequently, the gene  
202 encoding the secreted substrate is adjacent to genes encoding components of the  
203 secretion complex (Dirix *et al.*, 2004). The *raxX* gene therefore might have evolved  
204 from the gene for the secreted peptide substrate of the RaxAB ancestor. Finally, as  
205 we show here, homologs for the *raxST* gene are distributed broadly (**Fig. 5**).

206 The *raxX-raxSTAB* gene cluster does not exhibit features, such as a gene for a site-  
207 specific recombinase, characteristic of self-mobile genomic islands (Hacker *et al.*,  
208 1997). Moreover, variant-length alleles of the adjacent *gcvP* gene (**Fig. 4**) provide  
209 evidence for general recombination in the vicinity (Nelson *et al.*, 1997). Thus, the  
210 simplest model for *raxX-STAB* gene cluster lateral transfer is that it occurred through  
211 general recombination between genes flanking each side of the *raxX-STAB* gene  
212 cluster (**Fig. 1b**).

213 Three examples provide further evidence for lateral transfer. First, the *raxX-raxSTAB*  
214 gene cluster from the early branching species *X. translucens* has essentially the same  
215 size, composition and structure as the others. However, the *X. translucens raxX-*  
216 *raxSTAB* sequences are more divergent (**Table 2**). This predicts that the *raxX-raxSTAB*

Megan McDonald *et al.*

217 gene cluster has been part of the *X. translucens* genome sufficiently long for sequence  
218 alterations to accumulate (Kuo and Ochman 2009).

219 In the second example of evidence for lateral transfer, the *X. maliensis raxSTAB*  
220 sequences share strong similarity to those of *X. euvesicatoria* and the *X. axonopodis*  
221 pathovars *manihotis* and *phaseoli*, whereas their genome sequences are more  
222 divergent (**Table 2**). This suggests that *X. maliensis* acquired the *raxX-raxSTAB* gene  
223 cluster relatively recently (Kuo and Ochman 2009).

224 The final example of evidence for lateral transfer considers apparent loss of the *raxX-*  
225 *raxSTAB* gene cluster during differentiation of *X. citri* from the large group including  
226 *Xoo*, *X. euvesicatoria* and related species (Midha and Patil 2014; Rademaker *et al.*,  
227 2005; Vauterin *et al.*, 1995) (**Fig. 2**). Sequence in the *gcvP-"mfsX"* intergenic region is  
228 conserved among *raxX-raxSTAB* gene cluster-negative species, including *X. citri* (**Fig.**  
229 **1b**). This is consistent with loss from the *X. citri* lineage mediated by recombination,  
230 with the *gcvP-"mfsX"* region from a *raxX-raxSTAB* gene cluster-negative species. The  
231 result of this recombination would be replacement of the *raxX-raxSTAB* gene cluster  
232 with a conserved *gcvP-"mfsX"* region.

233 In an alternative scenario, where the *X. citri raxX-raxSTAB* gene cluster was lost  
234 through deletion, the remaining sequence in the intergenic region would more closely  
235 resemble the *raxX-raxSTAB* gene cluster-positive boundary sequence. This conclusion  
236 is not supported by the intergenic region found in *X. citri*. A second alternative scenario,  
237 that the *raxX-raxSTAB* gene cluster formed after *X. citri* speciation, is not supported by  
238 the analysis of *X. translucens* sequences described above.

Megan McDonald *et al.*

239 Broad phylogenetic distribution of the *raxX-raxSTAB* gene cluster implies that its  
240 associated phenotypes can contribute to host interactions with diverse *Xanthomonas*  
241 spp. The *raxX-raxSTAB* gene cluster was identified in the context of the rice XA21-  
242 mediated immune response (da Silva *et al.*, 2004; Pruitt *et al.*, 2015), but the sequence  
243 and functional similarities between the bacterial RaxX and the plant PSY sulfopeptides  
244 suggests that RaxX may mimic PSY phytohormone activities to facilitate infection (Pruitt  
245 *et al.*, 2017). Indeed, *Xoo* strains that cannot synthesize sulfated RaxX exhibit reduced  
246 virulence (Pruitt *et al.*, 2017).

247 Evidence for lateral transfer to *X. translucens* and *X. maliensis* suggests that *raxX-*  
248 *raxSTAB* gene cluster acquisition may contribute to emergence of new species or  
249 pathovars. The potentially useful phenotype of PSY hormone mimicry conceivably  
250 could introduce a particular strain to previously inaccessible hosts or niches. On the  
251 other hand, loss of the *raxX-raxSTAB* gene cluster apparently occurred during formation  
252 of the *X. citri* lineage (Fig. 2), perhaps indicating that the *raxX-raxSTAB* gene cluster did  
253 not enhance fitness in this case.

254 Pathovar phenotypes that differentiate bacterium-plant interactions, characterized  
255 extensively in members of the genus *Xanthomonas* (Jacques *et al.*, 2016), are not  
256 predicted by the presence or absence of the *raxX-raxSTAB* gene cluster. Some  
257 species that infect monocots exclusively contain the *raxX-raxSTAB* gene cluster (e.g.,  
258 *X. oryzae*, *X. translucens*), whereas others do not (e.g., *X. arboricola*, *X. hyacinthi*).  
259 Likewise, some species that infect dicots exclusively contain the *raxX-raxSTAB* gene  
260 cluster (e.g., *X. euvesicatoria*), whereas others do not (e.g., *X. campestris* pv.  
261 *campestris*; *X. citri*). Similarly, there is no association with tissue specificity; for  
262 example, a single species contains both vascular (*X. oryzae* pv. *oryzae*) and  
263 nonvascular (*X. oryzae* pv. *oryzicola*) pathogens.

Megan McDonald *et al.*

## MATERIALS AND METHODS

### Survey of *raxX-STAB* gene clusters in *Xanthomonas* spp.

264 All available *Xanthomonas* genomes were downloaded from the NCBI ftp server on  
265 January 29, 2016 (413 genome accessions). The genome fasta files were used to build  
266 a local blast database using BLASTv2.27+ (Camacho *et al.*, 2009). For all genes in and  
267 surrounding the *raxSTAB* operon blastn (evaluate cutoff of 1e-3) was used to identify  
268 homologs in the local blast database. Due to the small size of RaxX, tblastn was  
269 required to identify homologs (evaluate cutoff of 1e-3). Fasta files for each blast hit were  
270 generated using a custom python script (available upon request). Alignments of all  
271 genes were performed with Muscle v3.5 (Edgar 2004) implemented in the desktop tool  
272 Geneious v9.1.8 (Kearse *et al.*, 2012). Alignment ends were trimmed so that each  
273 sequence was equal in length and in the first coding frame. Maximum likelihood trees  
274 were built with RaxML v8.2.4 (Stamatakis 2014) with the following settings: (-m  
275 GTRGAMMA F -f a -x 3298589 -N 10000 -p 23). Trees shown in all figures are the  
276 highest scoring ML tree and numbers shown on branches are the resampled bootstrap  
277 values from 1000 replicates. Trees were drawn in FigTree v1.4.0  
278 (<http://tree.bio.ed.ac.uk/software/figtree/>).

279 Whole genome phylogenies were generated using the entire genome assembly with the  
280 program Andi v0.10 (Haubold *et al.*, 2015; Klotzl and Haubold 2016). These distance  
281 matrices were plotted as neighbor-joining tree using Phylip v3.695 (Felsenstein 1981).  
282 Numbers on the branches represent the proportion (0-100) that the branch appeared in  
283 the “bootstrapped” distance matrices using Andi.

Megan McDonald *et al.*

## Sequence analyses

Nucleotide and deduced amino acid sequences were edited and analyzed with the programs EditSeq<sup>TM</sup> (version 14.1.0), MegAlign<sup>TM</sup> (version 14.1.0) and SeqBuilder<sup>TM</sup> (version 14.1.0), DNASTAR, Madison, WI. The Integrated Microbial Genomes interface (Chen *et al.*, 2017) was used to compare genome segments from different species, and also to extract values for genome-wide Average Nucleotide Identity and genome Alignment Fraction (Varghese *et al.*, 2015).



Megan McDonald *et al.*

## **CONFLICT OF INTEREST**

The authors declare no conflict of interest.

## **ACKNOWLEDGMENTS**

Research reported in this publication was supported by the National Institute of General Medical Sciences of the National Institutes of Health under award number R01GM59962, and by the Division of Integrative Organismal Systems of the National Science Foundation under award number IOS-1237975. B.S. is supported by a Discovery Early Career Research Award from the Australian Research Council under award number DE150101897.

Megan McDonald *et al.*

## REFERENCES

- Amano Y, Tsubouchi H, Shinohara H, Ogawa M, Matsubayashi Y (2007). Tyrosine-sulfated glycopeptide involved in cellular proliferation and expansion in *Arabidopsis*. *Proc Natl Acad Sci U S A* **104**: 18333-18338.
- Aritua V, Parkinson N, Thwaites R, Heeney JV, Jones DR, Tushemereirwe W *et al* (2008). Characterization of the *Xanthomonas* sp. causing wilt of enset and banana and its proposed reclassification as a strain of *X. vasicola*. *Plant Pathol* **57**: 170-177.
- Bansal K, Midha S, Kumar S, Patil PB (2017). Ecological and evolutionary insights into pathovar diversity of *Xanthomonas citri*. *Appl Environ Microbiol* **83**: e02993-02916.
- Barak JD, Vancheva T, Lefeuvre P, Jones JB, Timilsina S, Minsavage GV *et al* (2016). Whole-genome sequences of *Xanthomonas euvesicatoria* strains clarify taxonomy and reveal a stepwise erosion of Type 3 effectors. *Front Plant Sci* **7**: 1805.
- Bart R, Cohn M, Kassen A, McCallum EJ, Shybut M, Petriello A *et al* (2012). High-throughput genomic sequencing of cassava bacterial blight strains identifies conserved effectors to target for durable resistance. *Proc Natl Acad Sci U S A* **109**: E1972-1979.
- Camacho C, Coulouris G, Avagyan V, Ma N, Papadopoulos J, Bealer K *et al* (2009). BLAST+: architecture and applications. *BMC Bioinformatics* **10**: 421.
- Chen IA, Markowitz VM, Chu K, Palaniappan K, Szeto E, Pillay M *et al* (2017). IMG/M: integrated genome and metagenome comparative data analysis system. *Nucleic Acids Res* **45**: D507-D516.
- Crossman LC, Gould VC, Dow JM, Vernikos GS, Okazaki A, Sebahia M *et al* (2008). The complete genome, comparative and functional analysis of *Stenotrophomonas maltophilia* reveals an organism heavily shielded by drug resistance determinants. *Genome Biol* **9**: R74.

Megan McDonald *et al.*

da Silva AC, Ferro JA, Reinach FC, Farah CS, Furlan LR, Quaggio RB *et al* (2002).

Comparison of the genomes of two *Xanthomonas* pathogens with differing host specificities. *Nature* **417**: 459-463.

da Silva FG, Shen Y, Dardick C, Burdman S, Yadav RC, de Leon AL *et al* (2004).

Bacterial genes involved in type I secretion and sulfation are required to elicit the rice Xa21-mediated innate immune response. *Mol Plant Microbe Interact* **17**: 593-601.

Dirix G, Monsieurs P, Dombrecht B, Daniels R, Marchal K, Vanderleyden J *et al* (2004).

Peptide signal molecules and bacteriocins in Gram-negative bacteria: a genome-wide in silico screening for peptides containing a double-glycine leader sequence and their cognate transporters. *Peptides* **25**: 1425-1440.

Dong D, Ako R, Wu B (2012). Crystal structures of human sulfotransferases: insights

into the mechanisms of action and substrate selectivity. *Expert Opin Drug Metab Toxicol* **8**: 635-646.

Edgar RC (2004). MUSCLE: multiple sequence alignment with high accuracy and high

throughput. *Nucleic Acids Res* **32**: 1792-1797.

Farzan M, Mirzabekov T, Kolchinsky P, Wyatt R, Cayabyab M, Gerard NP *et al* (1999).

Tyrosine sulfation of the amino terminus of CCR5 facilitates HIV-1 entry. *Cell* **96**: 667-676.

Felsenstein J (1981). Evolutionary trees from DNA sequences: a maximum likelihood

approach. *J Mol Evol* **17**: 368-376.

Ferreira-Tonin M, Rodrigues-Neto J, Harakava R, Destefano SA (2012). Phylogenetic

analysis of *Xanthomonas* based on partial *rpoB* gene sequences and species differentiation by PCR-RFLP. *Int J Syst Evol Microbiol* **62**: 1419-1424.

Megan McDonald *et al.*

Gardiner DM, Upadhyaya NM, Stiller J, Ellis JG, Dodds PN, Kazan K *et al* (2014).

Genomic analysis of *Xanthomonas translucens* pathogenic on wheat and barley reveals cross-kingdom gene transfer events and diverse protein delivery systems.

*PLoS One* **9**: e84995.

Goris J, Konstantinidis KT, Klappenbach JA, Coenye T, Vandamme P, Tiedje JM

(2007). DNA-DNA hybridization values and their relationship to whole-genome sequence similarities. *Int J Syst Evol Microbiol* **57**: 81-91.

Hacker J, Blum-Oehler G, Mühldorfer I, Tschäpe H (1997). Pathogenicity islands of

virulent bacteria: structure, function and impact on microbial evolution. *Mol Microbiol* **23**: 1089-1097.

Han SW, Lee SW, Bahar O, Schwessinger B, Robinson MR, Shaw JB *et al* (2012).

Tyrosine sulfation in a Gram-negative bacterium. *Nat Commun* **3**: 1153.

Hauben L, Vauterin L, Swings J, Moore ER (1997). Comparison of 16S ribosomal DNA

sequences of all *Xanthomonas* species. *Int J Syst Bacteriol* **47**: 328-335.

Haubold B, Klotzl F, Pfaffelhuber P (2015). andi: fast and accurate estimation of

evolutionary distances between closely related genomes. *Bioinformatics* **31**: 1169-1175.

Holland IB, Peherstorfer S, Kanonenberg K, Lenders M, Reimann S, Schmitt L (2016).

Type I protein secretion-deceptively simple yet with a wide range of mechanistic variability across the family. *EcoSal Plus* **7**: doi:10.1128/ecosalplus.ESP-0019-2015.

Jacobs JM, Pesce C, Lefeuvre P, Koebnik R (2015). Comparative genomics of a

cannabis pathogen reveals insight into the evolution of pathogenicity in *Xanthomonas*. *Front Plant Sci* **6**: 431.

Jacques MA, Arlat M, Boulanger A, Boureau T, Carrere S, Cesbron S *et al* (2016).

Using ecology, physiology, and genomics to understand host specificity in *Xanthomonas*. *Annu Rev Phytopathol* **54**: 163-187.

Megan McDonald *et al.*

Kakuta Y, Pedersen LG, Pedersen LC, Negishi M (1998). Conserved structural motifs in the sulfotransferase family. *Trends Biochem Sci* **23**: 129-130.

Kearse M, Moir R, Wilson A, Stones-Havas S, Cheung M, Sturrock S *et al* (2012). Geneious Basic: an integrated and extendable desktop software platform for the organization and analysis of sequence data. *Bioinformatics* **28**: 1647-1649.

Kleist AB, Getschman AE, Ziarek JJ, Nevins AM, Gauthier PA, Chevigne A *et al* (2016). New paradigms in chemokine receptor signal transduction: Moving beyond the two-site model. *Biochem Pharmacol* **114**: 53-68.

Klotzl F, Haubold B (2016). Support values for genome phylogenies. *Life (Basel)* **6**: 11.

Kuo CH, Ochman H (2009). The fate of new bacterial genes. *FEMS Microbiol Rev* **33**: 38-43.

Langlois PA, Snelling J, Hamilton JP, Bragard C, Koebnik R, Verdier V *et al* (2017). Characterization of the *Xanthomonas translucens* complex using draft genomes, comparative genomics, phylogenetic analysis, and diagnostic LAMP assays. *Phytopathology* **107**: 519-527.

Lin DY, Huang S, Chen J (2015). Crystal structures of a polypeptide processing and secretion transporter. *Nature* **523**: 425-430.

Ma J, Campbell A, Karlin S (2002). Correlations between Shine-Dalgarno sequences and gene features such as predicted expression levels and operon structures. *J Bacteriol* **184**: 5733-5745.

Mandal M, Lee M, Barrick JE, Weinberg Z, Emilsson GM, Ruzzo WL *et al* (2004). A glycine-dependent riboswitch that uses cooperative binding to control gene expression. *Science* **306**: 275-279.

Matsubayashi Y (2014). Posttranslationally modified small-peptide signals in plants. *Annu Rev Plant Biol* **65**: 385-413.

Megan McDonald *et al.*

Mhedbi-Hajri N, Hajri A, Boureau T, Darrasse A, Durand K, Brin C *et al* (2013).

Evolutionary history of the plant pathogenic bacterium *Xanthomonas axonopodis*.

*PLoS One* **8**: e58474.

Midha S, Patil PB (2014). Genomic insights into the evolutionary origin of *Xanthomonas axonopodis* pv. *citri* and its ecological relatives. *Appl Environ Microbiol* **80**: 6266-6279.

Mitchell JE, Zheng D, Busby SJ, Minchin SD (2003). Identification and analysis of 'extended -10' promoters in *Escherichia coli*. *Nucleic Acids Res* **31**: 4689-4695.

Moore ER, Kruger AS, Hauben L, Seal SE, Daniels MJ, De Baere R *et al* (1997). 16S rRNA gene sequence analyses and inter- and intrageneric relationships of *Xanthomonas* species and *Stenotrophomonas maltophilia*. *FEMS Microbiol Lett* **151**: 145-153.

Moore KL (2009). Protein tyrosine sulfation: a critical posttranslation modification in plants and animals. *Proc Natl Acad Sci U S A* **106**: 14741-14742.

Naushad S, Adeolu M, Wong S, Sohail M, Schellhorn HE, Gupta RS (2015). A phylogenomic and molecular marker based taxonomic framework for the order *Xanthomonadales*: proposal to transfer the families *Algiphilaceae* and *Solimonadaceae* to the order *Nevskiales* ord. nov. and to create a new family within the order *Xanthomonadales*, the family *Rhodanobacteraceae* fam. nov., containing the genus *Rhodanobacter* and its closest relatives. *Antonie Van Leeuwenhoek* **107**: 467-485.

Nelson K, Wang FS, Boyd EF, Selander RK (1997). Size and sequence polymorphism in the isocitrate dehydrogenase kinase/phosphatase gene (*aceK*) and flanking regions in *Salmonella enterica* and *Escherichia coli*. *Genetics* **147**: 1509-1520.

Niño-Liu DO, Ronald PC, Bogdanove AJ (2006). *Xanthomonas oryzae* pathovars: model pathogens of a model crop. *Mol Plant Pathol* **7**: 303-324.

Megan McDonald *et al.*

O'Leary NA, Wright MW, Brister JR, Ciuffo S, Haddad D, McVeigh R *et al* (2016).

Reference sequence (RefSeq) database at NCBI: current status, taxonomic expansion, and functional annotation. *Nucleic Acids Res* **44**: D733-745.

Parkinson N, Aritua V, Heeney J, Cowie C, Bew J, Stead D (2007). Phylogenetic analysis of *Xanthomonas* species by comparison of partial gyrase B gene sequences. *Int J Syst Evol Microbiol* **57**: 2881-2887.

Parkinson N, Cowie C, Heeney J, Stead D (2009). Phylogenetic structure of *Xanthomonas* determined by comparison of *gyrB* sequences. *Int J Syst Evol Microbiol* **59**: 264-274.

Pereira UP, Gouran H, Nascimento R, Adaskaveg JE, Goulart LR, Dandekar AM (2015). Complete genome sequence of *Xanthomonas arboricola* pv. *juglandis* 417, a copper-resistant strain isolated from *Juglans regia* L. *Genome Announc* **3**: e01126-01115.

Pieretti I, Cociancich S, Bolot S, Carrere S, Morisset A, Rott P *et al* (2015). Full genome sequence analysis of two isolates reveals a novel *Xanthomonas* species close to the sugarcane pathogen *Xanthomonas albilineans*. *Genes (Basel)* **6**: 714-733.

Potnis N, Timilsina S, Strayer A, Shanthyaraj D, Barak JD, Paret ML *et al* (2015). Bacterial spot of tomato and pepper: diverse *Xanthomonas* species with a wide variety of virulence factors posing a worldwide challenge. *Mol Plant Pathol* **16**: 907-920.

Pruitt RN, Schwessinger B, Joe A, Thomas N, Liu F, Albert M *et al* (2015). The rice immune receptor XA21 recognizes a tyrosine-sulfated protein from a Gram-negative bacterium. *Sci Adv* **1**: e1500245.

Pruitt RN, Joe A, Zhang W, Feng W, Stewart V, Schwessinger B *et al* (2017). A microbially derived tyrosine-sulfated peptide mimics a plant peptide hormone. *New Phytol* **215**: in press.

Megan McDonald *et al.*

Rademaker JLW, Louws FJ, Schultz MH, Rossbach U, Vauterin L, Swings J *et al*

(2005). A comprehensive species to strain taxonomic framework for *Xanthomonas*.

*Phytopathology* **95**: 1098-1111.

Ronald PC, Beutler B (2010). Plant and animal sensors of conserved microbial

signatures. *Science* **330**: 1061-1064.

Salzberg SL, Sommer DD, Schatz MC, Phillippy AM, Rabinowicz PD, Tsuge S *et al*

(2008). Genome sequence and rapid evolution of the rice pathogen *Xanthomonas*

*oryzae* pv. *oryzae* PXO99A. *BMC Genomics* **9**: 204.

Shen Y, Sharma P, da Silva FG, Ronald P (2002). The *Xanthomonas oryzae* pv. *oryzae*

*raxP* and *raxQ* genes encode an ATP sulphurylase and adenosine-5'-

phosphosulphate kinase that are required for AvrXa21 avirulence activity. *Mol*

*Microbiol* **44**: 37-48.

Song WY, Wang GL, Chen LL, Kim HS, Pi LY, Holsten T *et al* (1995). A receptor

kinase-like protein encoded by the rice disease resistance gene, *Xa21*. *Science* **270**:

1804-1806.

Stamatakis A (2014). RAxML version 8: a tool for phylogenetic analysis and post-

analysis of large phylogenies. *Bioinformatics* **30**: 1312-1313.

Stone MJ, Chuang S, Hou X, Shoham M, Zhu JZ (2009). Tyrosine sulfation: an

increasingly recognised post-translational modification of secreted proteins. *N*

*Biotechnol* **25**: 299-317.

Studholme DJ, Wasukira A, Paszkiewicz K, Aritua V, Thwaites R, Smith J *et al* (2011).

Draft genome sequences of *Xanthomonas sacchari* and two banana-associated

*Xanthomonads* reveal insights into the *Xanthomonas* group 1 clade. *Genes (Basel)*

**2**: 1050-1065.



Megan McDonald *et al.*

Teramoto T, Fujikawa Y, Kawaguchi Y, Kurogi K, Soejima M, Adachi R *et al* (2013).

Crystal structure of human tyrosylprotein sulfotransferase-2 reveals the mechanism of protein tyrosine sulfation reaction. *Nat Commun* **4**: 1572.

Thieme F, Koebnik R, Bekel T, Berger C, Boch J, Buttner D *et al* (2005). Insights into genome plasticity and pathogenicity of the plant pathogenic bacterium *Xanthomonas campestris* pv. *vesicatoria* revealed by the complete genome sequence. *J Bacteriol* **187**: 7254-7266.

Triplett LR, Hamilton JP, Buell CR, Tisserat NA, Verdier V, Zink F *et al* (2011). Genomic analysis of *Xanthomonas oryzae* isolates from rice grown in the United States reveals substantial divergence from known *X. oryzae* pathovars. *Appl Environ Microbiol* **77**: 3930-3937.

Triplett LR, Verdier V, Campillo T, Van Malderghem C, Cleenwerck I, Maes M *et al* (2015). Characterization of a novel clade of *Xanthomonas* isolated from rice leaves in Mali and proposal of *Xanthomonas maliensis* sp. nov. *Antonie Van Leeuwenhoek* **107**: 869-881.

Vancheva T, Bogatzevska N, Moncheva P, Lefeuvre P, Koebnik R (2015). Draft genome sequences of two *Xanthomonas vesicatoria* strains from the balkan peninsula. *Genome Announc* **3**: e01558-01514.

Vandroemme J, Cottyn B, Baeyen S, De Vos P, Maes M (2013). Draft genome sequence of *Xanthomonas fragariae* reveals reductive evolution and distinct virulence-related gene content. *BMC Genomics* **14**: 829.

Varghese NJ, Mukherjee S, Ivanova N, Konstantinidis KT, Mavrommatis K, Kyrpides NC *et al* (2015). Microbial species delineation using whole genome sequences. *Nucleic Acids Res* **43**: 6761-6771.

Vauterin L, Hoste B, Kersters K, Swings J (1995). Reclassification of *Xanthomonas*. *Int J Syst Bacteriol* **45**.

Megan McDonald *et al.*

Vauterin L, Rademaker J, Swings J (2000). Synopsis on the taxonomy of the genus *Xanthomonas*. *Phytopathology* **90**: 677-682.

Wang GL, Song WY, Ruan DL, Sideris S, Ronald PC (1996). The cloned gene, Xa21, confers resistance to multiple *Xanthomonas oryzae* pv. *oryzae* isolates in transgenic plants. *Mol Plant Microbe Interact* **9**: 850-855.

Wasukira A, Tayebwa J, Thwaites R, Paszkiewicz K, Aritua V, Kubiriba J *et al* (2012). Genome-wide sequencing reveals two major sub-lineages in the genetically monomorphic pathogen *Xanthomonas campestris* pathovar *musacearum*. *Genes (Basel)* **3**: 361-377.

Young JM (2008). An overview of bacterial nomenclature with special reference to plant pathogens. *Syst Appl Microbiol* **31**: 405-424.

Young JM, Park DC, Shearman HM, Fargier E (2008). A multilocus sequence analysis of the genus *Xanthomonas*. *Syst Appl Microbiol* **31**: 366-377.

Zhou JM, Tang D, Wang G (2017). Receptor kinases in plant pathogen interactions: more than pattern recognition. *Plant Cell* **29**: 618-637.

Megan McDonald *et al.*

**Figure 1.** The *raxX-raxSTAB* gene cluster. A. The *rax* genetic region, drawn to scale. B. Boundary sequences. Sequences conserved within a group but different from other groups are colored green, brown, or yellow. Black sequence is conserved in all lineages, and blue sequence represents matches to consensi for transcription and translation initiation sequences. An “*mfsX*” +1 frameshift in *Xoo* sequences is indicated by the vertical red line. Abbreviations: *S. maltophilia*, *Sm*; *X. albilineans*, *Xa*; *X. arboricola* pv. *juglandis*, *Xaj*; *X. axonopodis* pv. *manihotis*, *Xam*; *X. campestris* pv. *campestris*, *Xcc*; *X. campestris* pv. *musacearum*, *Xcm*; *X. cannabis*, *Xc*; *X. citri* subsp. *citri*, *Xac*; *X. euvesicatoria*, *Xe*; *X. fragariae*, *Xf*; *X. hyacinthi*, *Xh*; *X. maliensis*, *Xm*; *X. oryzae* pv. *oryzae*, *Xoo*; *X. sacchari*, *Xs*; *X. translucens*, *Xt*; *X. vesicatoria*, *Xv*.

**Figure 2.** Model for *raxX-raxSTAB* inheritance during *Xanthomonas* speciation. The *Xanthomonas* spp. cladogram is based on published phylogenetic trees; see text for references. Gray lines depict lineages for strains that lack the *raxX-raxSTAB* gene cluster, whereas black lines depict those that carry the cluster. Numbers indicate *gcvP* length polymorphism in each species (see **Fig. 4**). Hypothetical events are: A, formation of the *raxX-raxSTAB* gene cluster; B, lateral transfer to *X. translucens*; C, lateral transfer to *X. maliensis*; D, loss from *X. citri*.

**Figure 3.** Phylogenetic trees for *rax* gene nucleotide sequences. The best scoring maximum likelihood trees for (A) *raxA*, (B) *raxB*, (C) *raxX* and (D) *raxST* in *Xanthomonas* spp. Numbers shown on branches represent the proportion of branches supported by 10,000 bootstrap replicates (0-100). Bootstraps are not shown for branches with less than 50% support, nor for branches too short to easily distinguish.

Megan McDonald *et al.*

**Figure 4.** GcvP length polymorphisms. The relevant portion of the GcvP amino acid sequence is shown for each of the reference strains. Species in red lack the *raxX-raxSTAB* gene cluster, whereas those in blue lines carry the cluster. Numbers denote different allelic types. The positions of residues Gly-733 and Val-738 (numbering for allelic type 1) are indicated. Abbreviations are as in Fig. 1b.

**Figure 5.** Phylogenetic tree for *raxST* homologs in diverse bacterial genera. Distribution of *raxST* homologs across bacterial genera. The tree shown was constructed by neighbor-joining with 1000 bootstrap replicates; branches with < 50% bootstrap support are not drawn. The *raxST* sequence from *Xoo* strain PXO99<sup>A</sup> was used as query for tBLASTn.

**Figure S1.** Whole genome-based *Xanthomonas* phylogenetic tree. Phylogenetic tree constructed from comparison of whole genome sequences; see text for details. See **Fig. 2** for the corresponding cladogram. Red lines depict lineages for strains that lack the *raxX-raxSTAB* gene cluster, whereas blue lines depict those that carry the cluster.

Megan McDonald *et al.*

**Figure S1.**

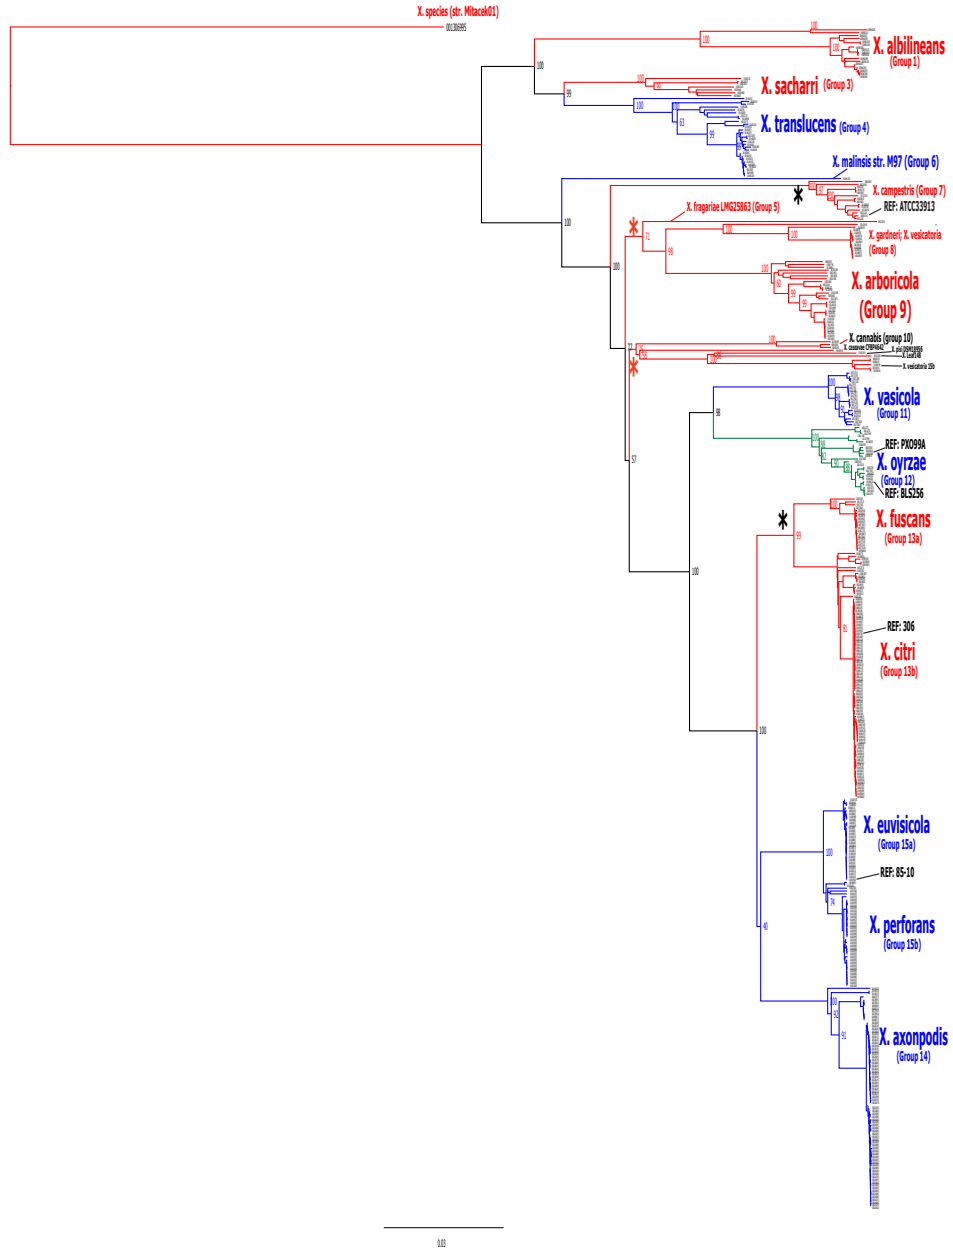

Megan McDonald *et al.*

**Table 1.** Reference strains for sequence comparisons.

| Species                                    | Strain             | <i>raxX</i> -  |                   | Reference                         |
|--------------------------------------------|--------------------|----------------|-------------------|-----------------------------------|
|                                            |                    | <i>raxSTAB</i> | Accession         |                                   |
| <i>S. maltophilia</i>                      | K279a              | –              | NC_010943.1       | (Crossman <i>et al.</i> , 2008)   |
| <i>X. albilineans</i>                      | GPE PC73           | –              | NC_013722.1       | (Pieretti <i>et al.</i> , 2015)   |
| <i>X. arboricola</i> pv. <i>juglandis</i>  | Xaj 417            | –              | NZ_CP012251.1     | (Pereira <i>et al.</i> , 2015)    |
| <i>X. axonopodis</i> pv. <i>manihotis</i>  | UA536              | +              | NZ_AKEQ00000000   | (Bart <i>et al.</i> , 2012)       |
| <i>X. campestris</i> pv. <i>campestris</i> | ATCC 33913         | –              | NC_003902.1       | (da Silva <i>et al.</i> , 2002)   |
| <i>X. campestris</i> pv. <i>musacearum</i> | NCPPB 4392         | +              | NZ_AKBI00000000.1 | (Wasukira <i>et al.</i> , 2012)   |
| <i>X. cannabis</i>                         | NCPPB 2877         | –              | NZ_JSZE00000000.1 | (Jacobs <i>et al.</i> , 2015)     |
| <i>X. citri</i> subsp. <i>citri</i>        | 306                | –              | NC_003919.1       | (da Silva <i>et al.</i> , 2002)   |
| <i>X. euvesicatoria</i>                    | 85-10              | +              | NZ_CP017190.1     | (Thieme <i>et al.</i> , 2005)     |
| <i>X. fragariae</i>                        | LMG 25863          | –              | NZ_AJRZ00000000.1 | (Vandroemme <i>et al.</i> , 2013) |
| <i>X. hyacinthi</i>                        | DSM 19077          | –              | JPLD00000000.1    | (Naushad <i>et al.</i> , 2015)    |
| <i>X. maliensis</i>                        | M97                | +              | NZ_AQPR00000000.1 | (Triplett <i>et al.</i> , 2015)   |
| <i>X. oryzae</i> pv. <i>oryzae</i>         | PXO99 <sup>A</sup> | +              | NC_010717.2       | (Salzberg <i>et al.</i> , 2008)   |
| <i>X. sacchari</i>                         | R1                 | –              | NZ_CP010409.1     | (Studholme <i>et al.</i> , 2011)  |
| <i>X. translucens</i>                      | DAR61454           | +              | GCA_000334075.1   | (Gardiner <i>et al.</i> , 2014)   |
| <i>X. vesicatoria</i>                      | 15b                | –              | NZ_JSXZ00000000.1 | (Vancheva <i>et al.</i> , 2015)   |

Megan McDonald *et al.*

**Table 2.** Nucleotide sequence identity between *rax* genes.

| Species                                     | Comparison to <i>X. euvesicatoria</i> sequence |                |              |             |             |                 |                   |                 |
|---------------------------------------------|------------------------------------------------|----------------|--------------|-------------|-------------|-----------------|-------------------|-----------------|
|                                             | % Nucleotide identity                          |                |              |             |             |                 | Genome            |                 |
|                                             | <i>gcvP</i>                                    | <i>raxX</i>    | <i>raxST</i> | <i>raxA</i> | <i>raxB</i> | " <i>mfsX</i> " | gANI <sup>a</sup> | AF <sup>b</sup> |
| <i>X. citri</i> subsp. <i>citri</i>         | 94.8                                           | — <sup>c</sup> | —            | —           | —           | 97.3            | 94.9              | 0.80            |
| <i>X. axonopodis</i> pv. <i>manihotis</i>   | 94.1                                           | 99.0           | 96.1         | 97.6        | 95.8        | 97.3            | 95.0              | 0.79            |
| <i>X. maliensis</i>                         | 93.5                                           | 89.5           | 96.4         | 95.0        | 96.4        | <b>85.0</b>     | <b>83.5</b>       | <b>0.66</b>     |
| <i>X. campestris</i> pv. <i>malvacearum</i> | 91.3                                           | 82.2           | 91.4         | 90.9        | 93.2        | 93.6            | 91.2              | 0.72            |
| <i>X. oryzae</i> pv. <i>oryzae</i>          | 92.8                                           | 88.5           | 91.4         | 87.6        | 89.5        | 91.6            | 91.2              | 0.61            |
| <i>X. translucens</i>                       | 88.7                                           | 63.1           | 80.7         | 71.0        | 77.3        | 80.4            | 80.4              | 0.54            |

<sup>a</sup> genome-wide Average Nucleotide Identity (Varghese *et al.*, 2015).

<sup>b</sup> genome Alignment Fraction, from *X. euvesicatoria* to subject species (Varghese *et al.*, 2015).

<sup>c</sup> —, gene not present

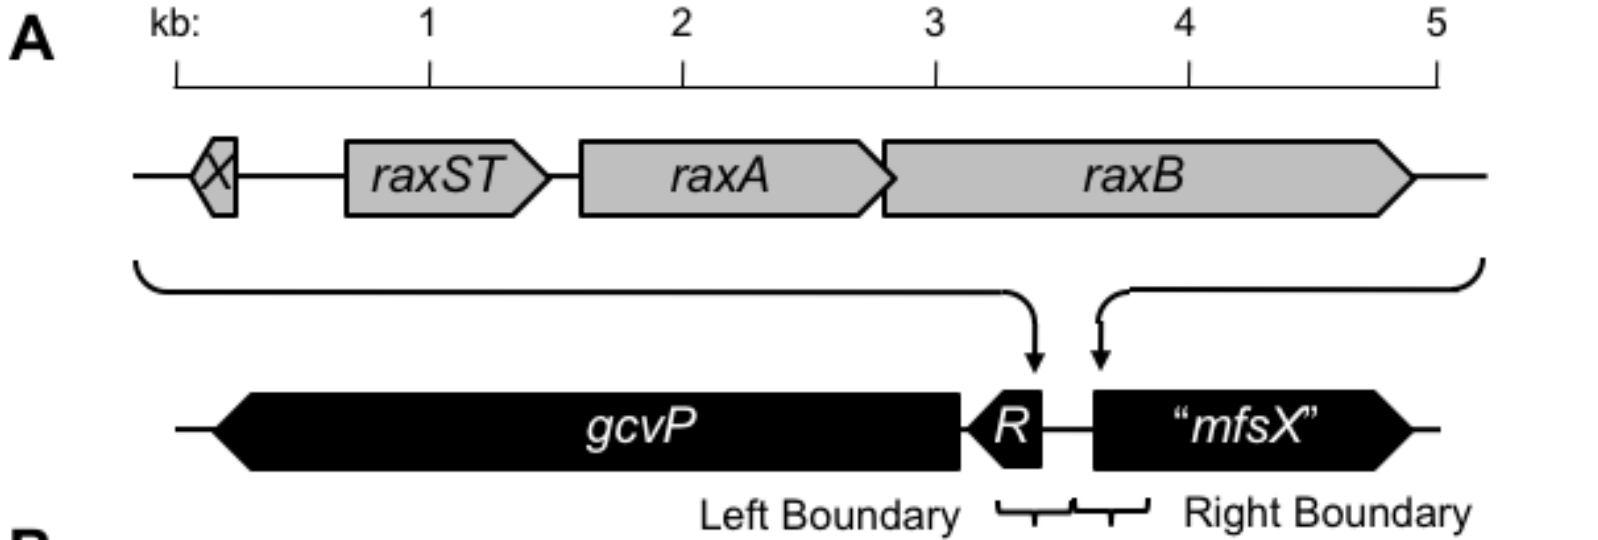

**B**

Left Boundary:

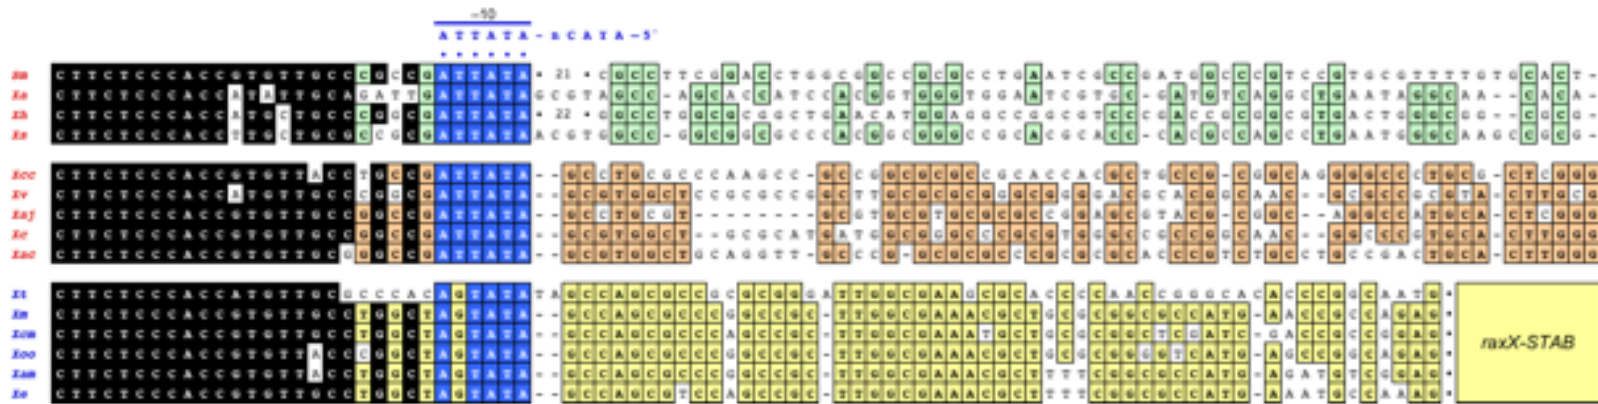

Right Boundary:

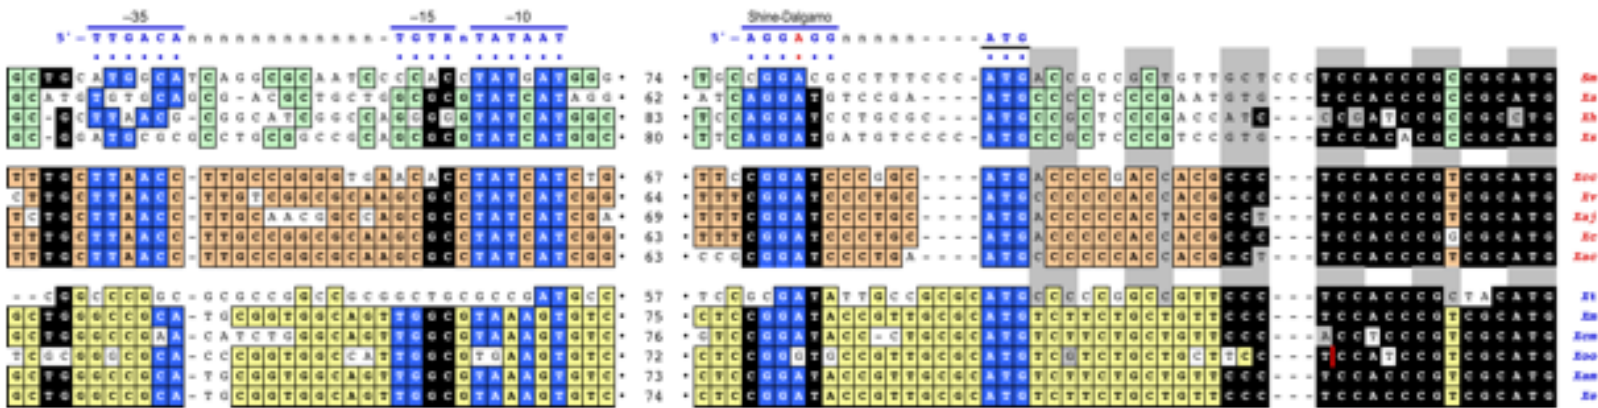



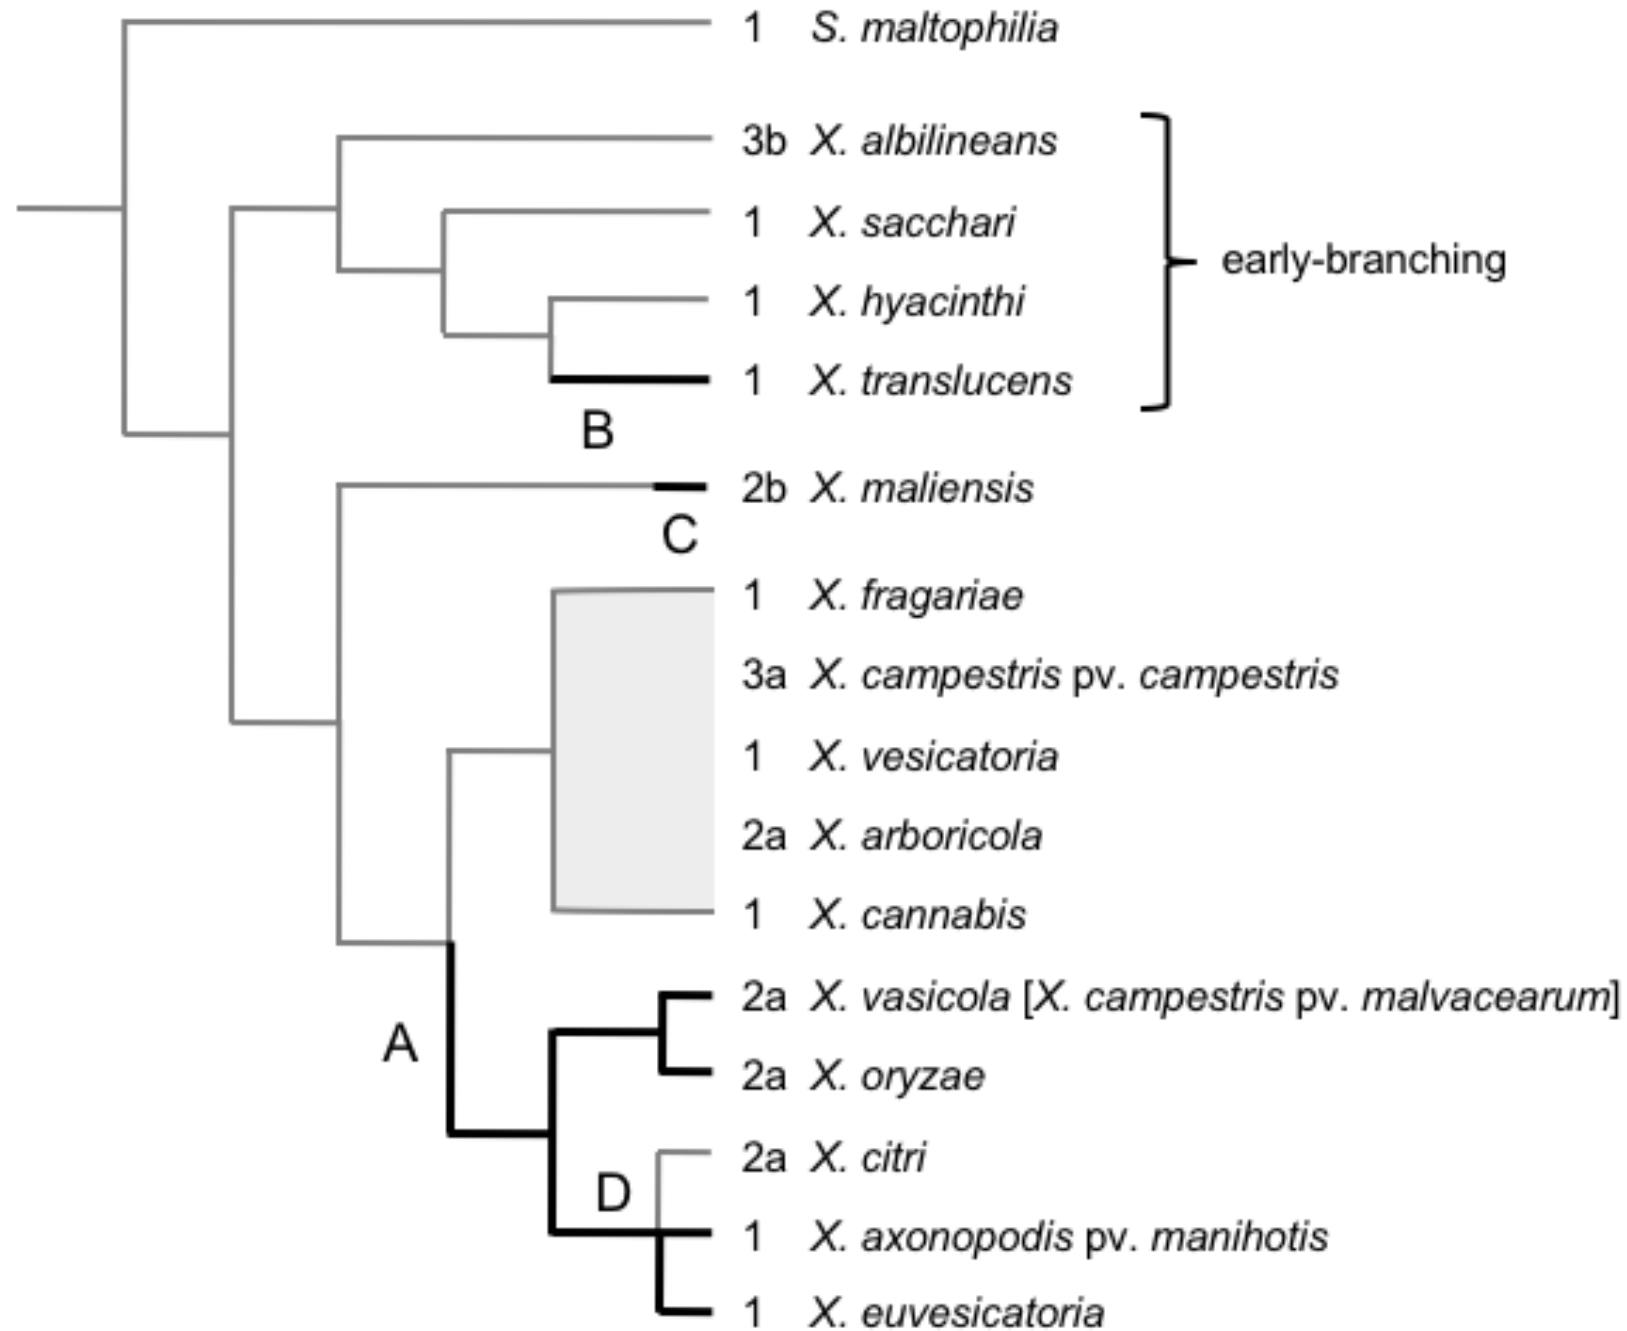

**A** *raxA*

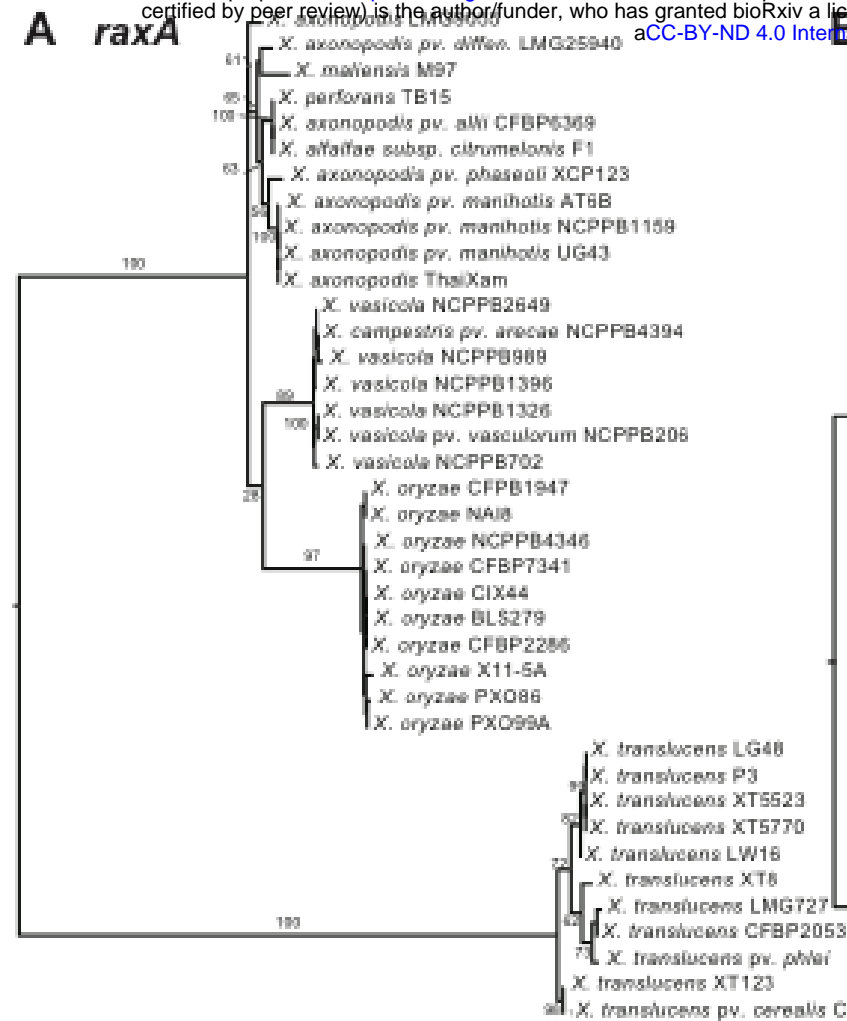

**B** *raxB*

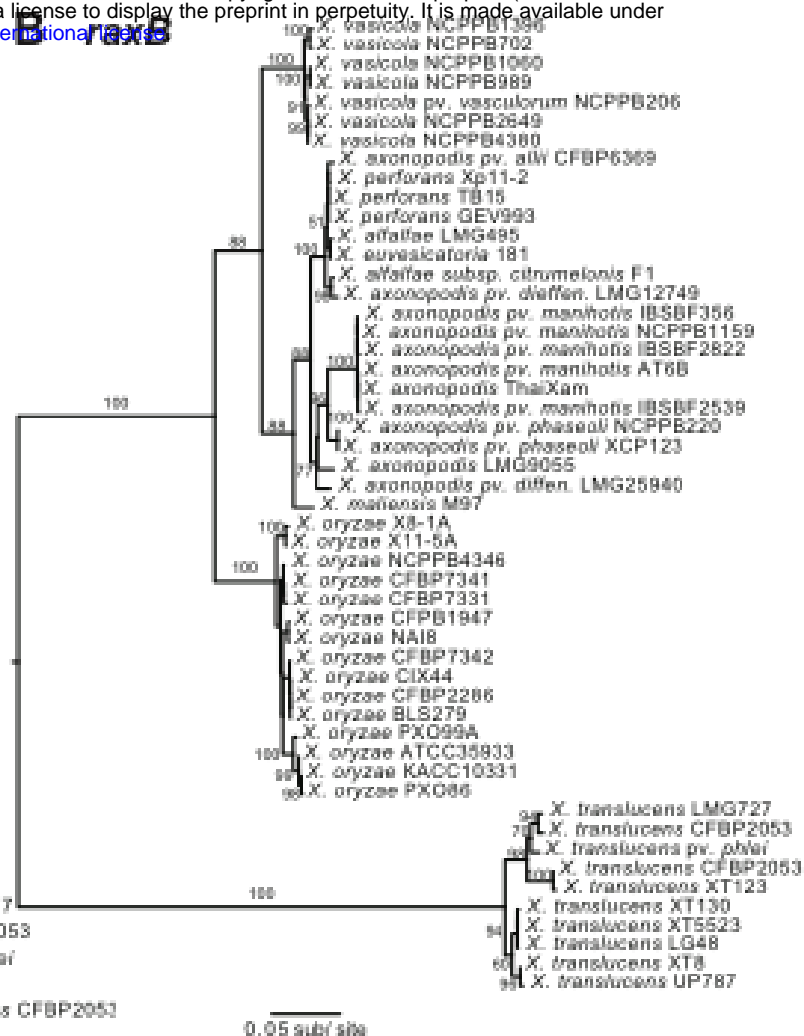

**C** *raxX*

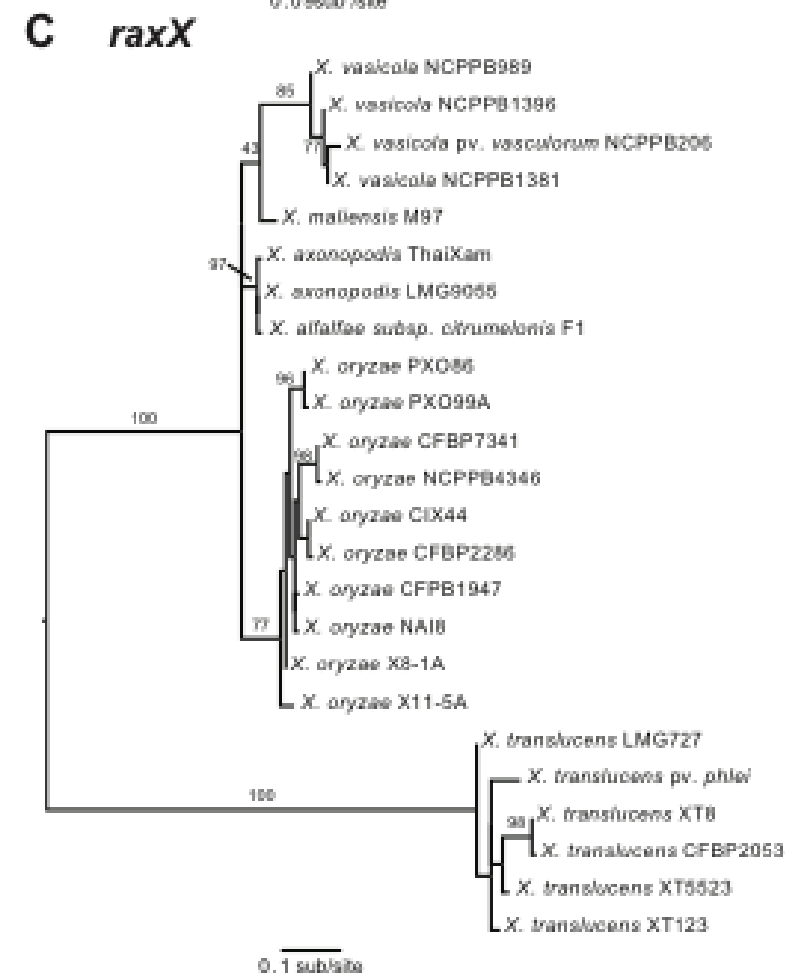

**D** *raxST*

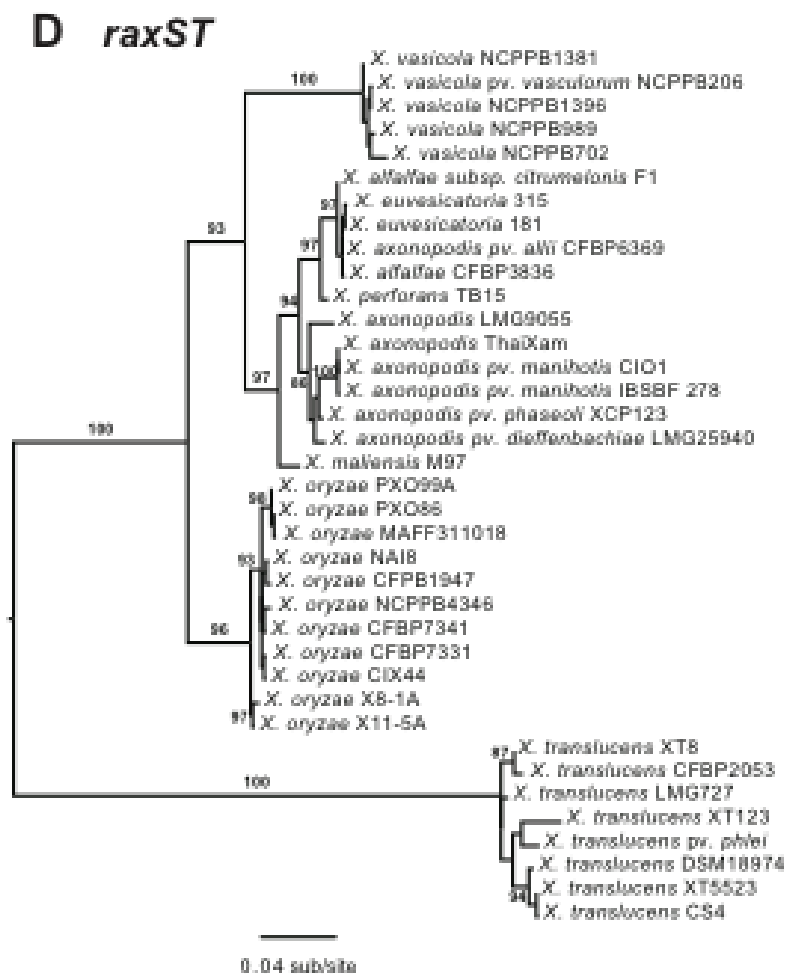



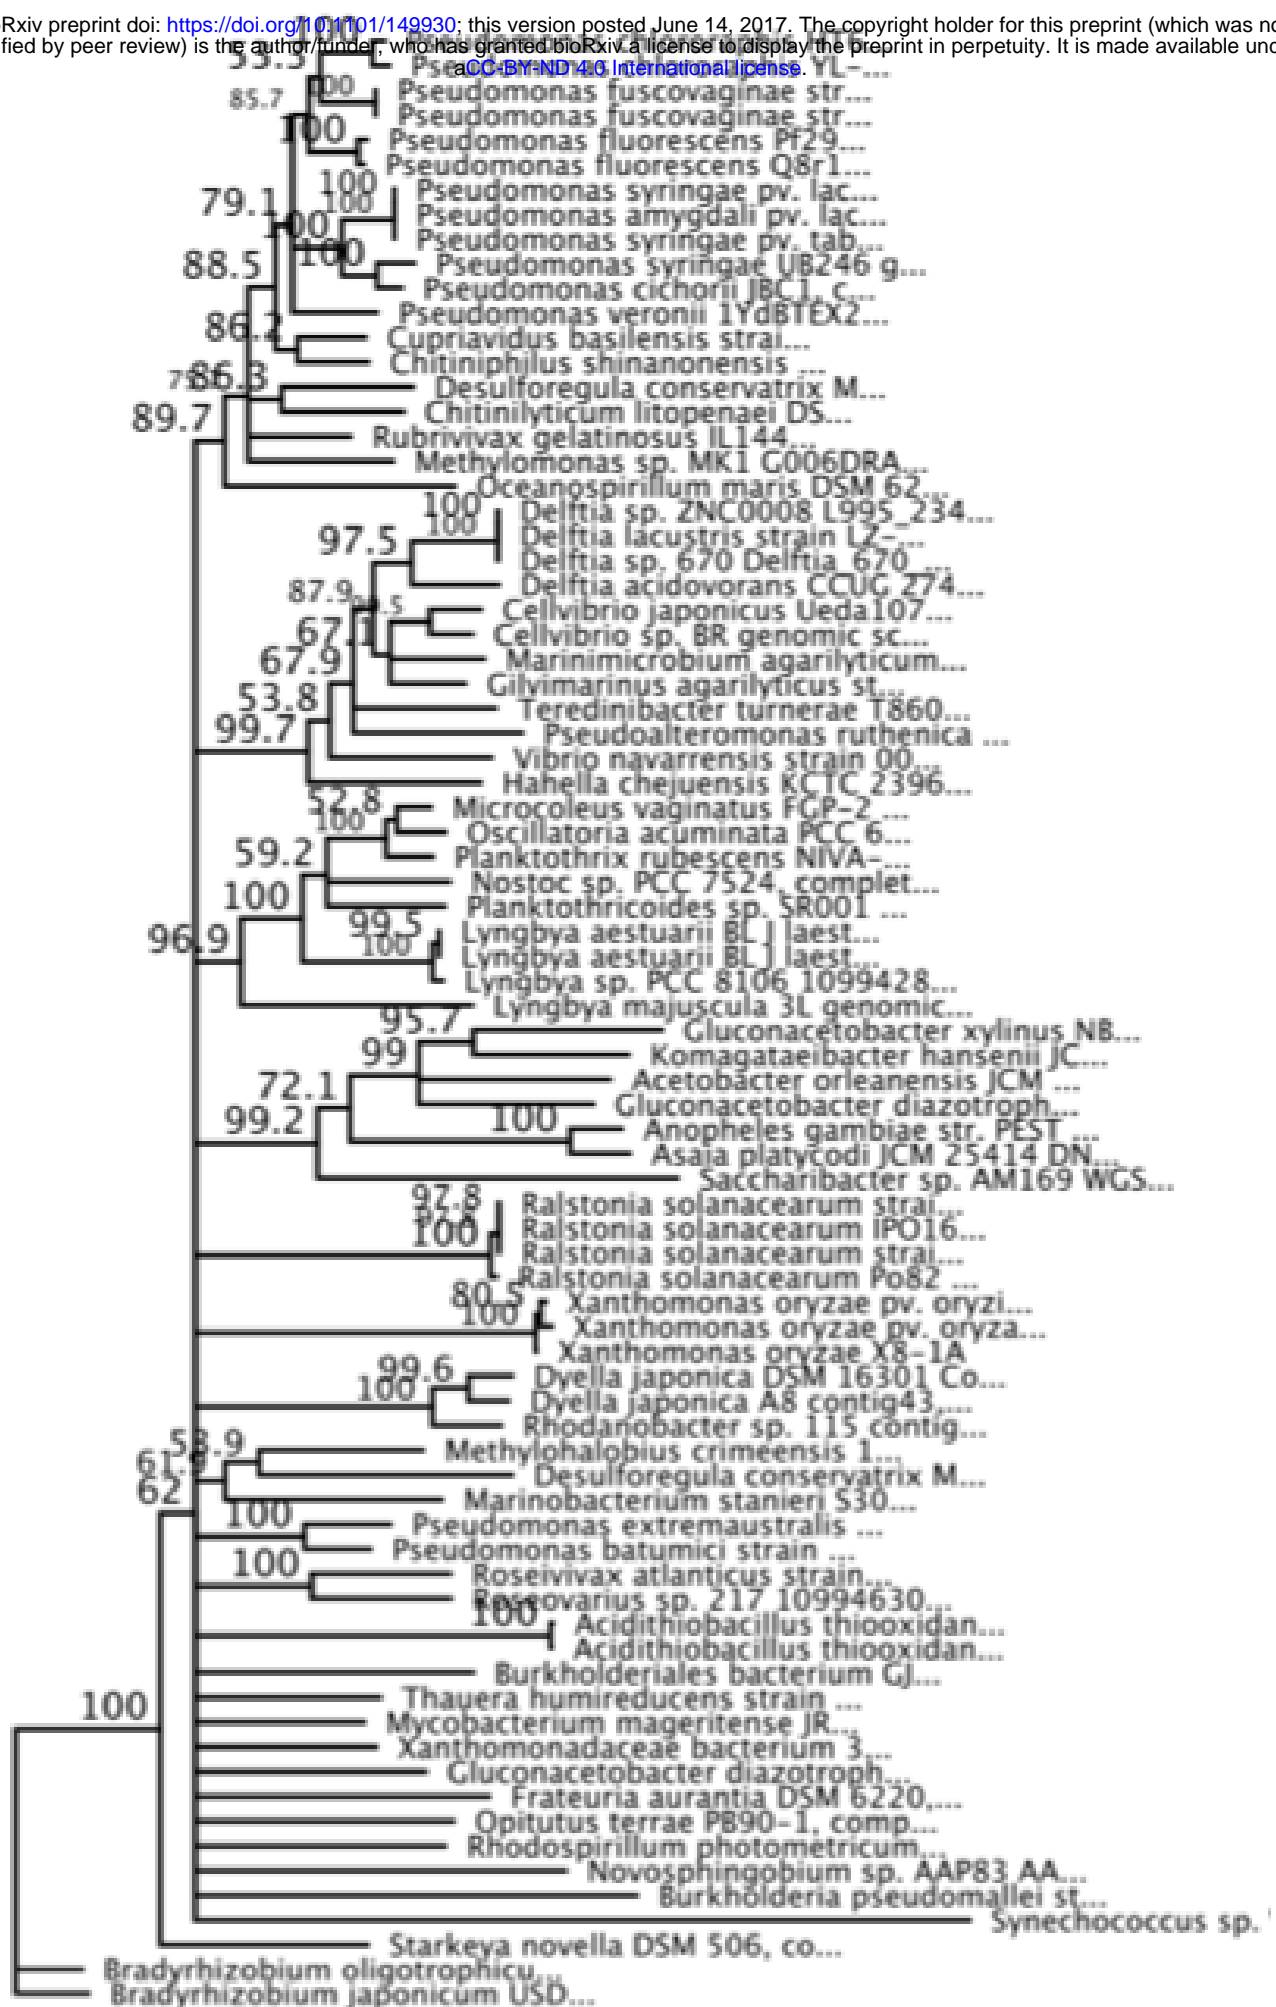

Source: https://www.biorxiv.org/content/10.1101/149930v1.full.pdf
